# Supplementary material for: Different guidelines for pre-exposure prophylaxis (PrEP) eligibility estimate HIV risk differently: an incidence study in a cohort of HIV-negative men who have sex with men, Portugal, 2014–2018
Source: PubMed Central journal article supplement (PMC7376846; doi:10.2807/1560-7917.es.2020.25.28.1900636), 2020-07-16
Supplement: 19-00636_Supplement_MEIRELES.pdf [file 19-00636_Supplement_MEIRELES.pdf]

**Supplementary table 1. Association between HIV incidence and eligibility for PrEP according to the WHO, US CDC, and EACS guidelines, Portugal, 2014-2018 (n=2,398).**

Disclaimer: This supplementary material is hosted by *Eurosurveillance* as supporting information alongside the article entitled 'Different guidelines for pre-exposure prophylaxis (PrEP) eligibility estimate HIV risk differently: an incidence study in a cohort of HIV-negative men who have sex with men, Portugal, 2014-2018', on behalf of the authors, who remain responsible for the accuracy and appropriateness of the content. The same standards for ethics, copyright, attributions and permissions as for the article apply. Supplements are not edited by *Eurosurveillance* and the journal is not responsible for the maintenance of any links or email addresses provided therein.

|                                                                        | <b>HIV cases</b> | <b>Person-years</b> | <b>IR per 100 person-years (95% CI)</b> | <b>IRR (95% CI)</b> |
|------------------------------------------------------------------------|------------------|---------------------|-----------------------------------------|---------------------|
| <b>Overall</b>                                                         | 97               | 5,257.75            | 1.84 (1.51-2.25)                        | Not applicable      |
| <b>Eligibility for PrEP at baseline</b>                                |                  |                     |                                         |                     |
| <b>World Health Organization (2017)</b>                                |                  |                     |                                         |                     |
| Ineligible                                                             | 32               | 2,326.67            | 1.38 (0.97-1.94)                        | Reference           |
| Eligible                                                               | 65               | 2,931.08            | 2.22 (1.74-2.83)                        | 1.61 (1.06-2.46)    |
| <b>United States Centers for Disease Control and Prevention (2017)</b> |                  |                     |                                         |                     |
| Ineligible                                                             | 22               | 1,847.26            | 1.19 (0.78-1.81)                        | Reference           |
| Eligible                                                               | 75               | 3,410.49            | 2.20 (1.75-2.76)                        | 1.85 (1.15-2.97)    |
| <b>European AIDS Clinical Society (2017)</b>                           |                  |                     |                                         |                     |
| Ineligible                                                             | 49               | 2,982.77            | 1.64 (1.24-2.17)                        | Reference           |
| Eligible                                                               | 48               | 2,274.98            | 2.11 (1.59-2.80)                        | 1.28 (0.86-1.91)    |

CI: confidence interval; EACS: European AIDS Clinical Society; HIV: human immunodeficiency virus; IR: incidence rate; IRR: incidence rate ratio; PrEP: preexposure prophylaxis; US CDC: United States, Centers for Disease Control and Prevention; WHO: World Health Organization.

**Supplementary table 2: Description at baseline of participants with and without follow-up visits among those who with complete information about the eligibility status at baseline, Portugal, 2014-2018.**

Disclaimer: This supplementary material is hosted by *Eurosurveillance* as supporting information alongside the article entitled 'Different guidelines for pre-exposure prophylaxis (PrEP) eligibility estimate HIV risk differently: an incidence study in a cohort of HIV-negative men who have sex with men, Portugal, 2014-2018', on behalf of the authors, who remain responsible for the accuracy and appropriateness of the content. The same standards for ethics, copyright, attributions and permissions as for the article apply. Supplements are not edited by *Eurosurveillance* and the journal is not responsible for the maintenance of any links or email addresses provided therein.

| Characteristics                                                 | Participants without follow-up<br>N=2,095 |      | Participants with follow-up<br>N=1,254 |      | p-value            |
|-----------------------------------------------------------------|-------------------------------------------|------|----------------------------------------|------|--------------------|
|                                                                 | n                                         | %    | n                                      | %    |                    |
| <b>Age (years)</b>                                              |                                           |      |                                        |      |                    |
| Mean (standard deviation)                                       | 30.6 (9.48)                               |      | 30.0 (9.34)                            |      | 0.063 <sup>a</sup> |
| Median, 25th-75th percentile                                    | 28.7 (23.5-35.6)                          |      | 27.1 (23.0-35.3)                       |      | 0.012 <sup>b</sup> |
| Range                                                           | 16.2-74.4                                 |      | 18.0-69.0                              |      | n.a.               |
| <b>Country/region of origin</b>                                 |                                           |      |                                        |      |                    |
| Portugal                                                        | 1500                                      | 71.6 | 965                                    | 77.0 | 0.001 <sup>c</sup> |
| Brazil                                                          | 271                                       | 12.9 | 122                                    | 9.7  |                    |
| Other European country                                          | 185                                       | 8.8  | 111                                    | 8.9  |                    |
| African country                                                 | 56                                        | 2.7  | 32                                     | 2.6  |                    |
| Other American country                                          | 48                                        | 2.3  | 16                                     | 1.3  |                    |
| Asia/Middle east/Oceania                                        | 34                                        | 1.6  | 8                                      | 0.6  |                    |
| <b>Educational level</b>                                        |                                           |      |                                        |      |                    |
| Basic education or less                                         | 119                                       | 5.7  | 50                                     | 4.0  | 0.031 <sup>c</sup> |
| Secondary education                                             | 656                                       | 31.4 | 428                                    | 34.2 |                    |
| Professional training                                           | 51                                        | 2.4  | 40                                     | 3.2  |                    |
| Postsecondary                                                   | 26                                        | 1.2  | 14                                     | 1.1  |                    |
| Bachelor                                                        | 831                                       | 39.7 | 452                                    | 36.1 |                    |
| Master or doctoral                                              | 409                                       | 19.6 | 269                                    | 21.5 |                    |
| Rather not say                                                  | 2                                         |      | 1                                      |      |                    |
| <b>Sexual identity</b>                                          |                                           |      |                                        |      |                    |
| Gay                                                             | 1729                                      | 82.7 | 1037                                   | 82.8 | 0.557 <sup>c</sup> |
| Bisexual                                                        | 286                                       | 13.7 | 177                                    | 14.1 |                    |
| Heterosexual                                                    | 32                                        | 1.5  | 12                                     | 1.0  |                    |
| Other/does not use a term/does not know                         | 44                                        | 2.1  | 27                                     | 2.2  |                    |
| Rather not say                                                  | 4                                         |      | 1                                      |      |                    |
| <b>Previous HIV testing</b>                                     |                                           |      |                                        |      |                    |
| No                                                              | 493                                       | 23.5 | 296                                    | 23.6 | 0.996 <sup>c</sup> |
| Yes                                                             | 1602                                      | 76.5 | 958                                    | 76.4 |                    |
| <b>Reason for the index test</b>                                |                                           |      |                                        |      |                    |
| Reasons related to symptoms <sup>d</sup>                        | 145                                       | 7.0  | 76                                     | 6.1  | 0.215 <sup>c</sup> |
| Reasons related to risk exposure <sup>e</sup>                   | 1339                                      | 64.2 | 835                                    | 67.1 |                    |
| Reasons not related to symptoms or risk exposure <sup>f</sup>   | 602                                       | 28.9 | 333                                    | 26.8 |                    |
| Missing                                                         | 9                                         |      | 10                                     |      |                    |
| <b>Eligible for PrEP, no</b>                                    |                                           |      |                                        |      |                    |
| <b>World Health Organization</b>                                |                                           |      |                                        |      |                    |
| Ineligible                                                      | 884                                       | 4.2  | 489                                    | 39.0 | 0.074 <sup>c</sup> |
| Eligible                                                        | 1211                                      | 57.8 | 765                                    | 61.0 |                    |
| <b>United States Centers for Disease Control and Prevention</b> |                                           |      |                                        |      |                    |
| Ineligible                                                      | 679                                       | 32.4 | 396                                    | 31.6 | 0.645 <sup>c</sup> |
| Eligible                                                        | 1416                                      | 67.6 | 858                                    | 68.4 |                    |
| <b>European AIDS Clinical Society</b>                           |                                           |      |                                        |      |                    |
| Ineligible                                                      | 1154                                      | 55.1 | 642                                    | 51.2 | 0.032 <sup>c</sup> |
| Eligible                                                        | 941                                       | 44.9 | 612                                    | 48.8 |                    |

| Portuguese National Health Service |      |      |     |      |                    |
|------------------------------------|------|------|-----|------|--------------------|
| Ineligible                         | 824  | 39.3 | 495 | 39.5 | 0.870 <sup>c</sup> |
| Eligible                           | 1271 | 60.7 | 759 | 60.5 |                    |

<sup>a</sup> p-value for the t-test for independent samples

<sup>b</sup> p-value for the Mann-Whitney test

<sup>c</sup> p-value for the chi-square test

<sup>d</sup> Participants reported 'Symptoms/medical indication.'

<sup>e</sup> Participants did not report 'Symptoms/medical indication' and reported at least 1 of the following reasons: 'Anonymous partner notification,' 'Partner was diagnosed with HIV/disclosed HIV status,' 'Window period in the previous test,' 'Condom failure,' 'Perception of recent exposure to HIV,' or 'Perception of exposure to HIV more than 3 months.'

<sup>f</sup> Participants did not report 'Symptoms/medical indication' and did not report any of the reasons coded as related to risk exposure and reported at least 1 of the following reasons: 'Asked by a sexual partner,' 'Before discontinuing using the condom with my partner,' 'Beginning of a new relationship,' 'End of relationship with my usual partner,' or 'To know health status/routine.'

HIV: human immunodeficiency virus; n.a.: not applicable; PrEP: preexposure prophylaxis.
